# Supplementary material for: Measurement report: Characteristics of airborne black carbon-containing particles during the 2021 summer COVID-19 lockdown in Yangzhou, China
Source: Copernicus journal article supplement (doi:10.5194/egusphere-2023-2454), 2023-12-04
Supplement: Supplementary file 2 [file egusphere-2023-2454-supplement.pdf]

*Supplement of*

**Measurement report : Characteristics of airborne black carbon-containing particles during the 2021 summer COVID-19 lockdown in Yangzhou, China**

**Yuan Dai et al.**

*Correspondence to:* Xinlei Ge ([caxinra@163.com](mailto:caxinra@163.com))

**Table S1.** Summary of descriptions of BCc particle types

| Type group | Classification of particles | Description of species                                                   | Characteristics ion markers                                                                                                                                                                                                                                                      |
|------------|-----------------------------|--------------------------------------------------------------------------|----------------------------------------------------------------------------------------------------------------------------------------------------------------------------------------------------------------------------------------------------------------------------------|
| BC-fresh   | BCpure                      | Almost completely BC                                                     | $[C_n]^+$ and $[C_n]^-$                                                                                                                                                                                                                                                          |
|            | BB                          | BC from biomass burning                                                  | 39[K] <sup>+</sup> (peak area >1500) and two of the signals in 45[CHO <sub>2</sub> ] <sup>-</sup> , 59[C <sub>2</sub> H <sub>3</sub> O <sub>2</sub> ] <sup>-</sup> and 73[C <sub>3</sub> H <sub>5</sub> O <sub>2</sub> ] <sup>-</sup> (peak area >200)                           |
|            | CC                          | BC from coal combustion                                                  | 7[Li] <sup>+</sup> (peak area >200) or 23[Na] <sup>+</sup> , 27[Al] <sup>3+</sup> , 43[AlO] <sup>-</sup> (peak area >200) or 80[SO <sub>3</sub> ] <sup>-</sup> , 97[HSO <sub>4</sub> ] <sup>-</sup> (relative peak area >2%).                                                    |
|            | VE                          | BC from traffic emission                                                 | 55[Mn] <sup>+</sup> (peak area >200 without [Na] <sup>+</sup> and [Al] <sup>+</sup> ) or 40[Ca] <sup>+</sup> (with abundant nitrate) or 79[PO <sub>3</sub> ] <sup>-</sup> (with abundant nitrate) or 51[V] <sup>+</sup> and 67[VO] <sup>+</sup> (peak area >200).                |
|            | Mix                         | BC mixed more than one sources                                           | Same as the above.                                                                                                                                                                                                                                                               |
| BC-aged    | BC-S                        | BC internally mixed with sulfate                                         | 97[HSO <sub>4</sub> ] <sup>-</sup> (relative peak area >70%).                                                                                                                                                                                                                    |
|            | BC-N                        | BC internally mixed with nitrate                                         | 46[NO <sub>2</sub> ] <sup>-</sup> and 62[NO <sub>3</sub> ] <sup>-</sup> (relative peak area >70%).                                                                                                                                                                               |
|            | BC-SN                       | BC internally mixed with sulfate and nitrate                             | 46[NO <sub>2</sub> ] <sup>-</sup> and 62[NO <sub>3</sub> ] <sup>-</sup> are comparable with 97[HSO <sub>4</sub> ] <sup>-</sup> .                                                                                                                                                 |
|            | BCOC-S                      | BC internally mixed with OC and sulfate                                  | three of the signals in 37[C <sub>3</sub> H] <sup>+</sup> , 43[C <sub>2</sub> H <sub>3</sub> O] <sup>+</sup> , 51[C <sub>4</sub> H <sub>3</sub> ] <sup>+</sup> and 63[C <sub>5</sub> H <sub>3</sub> ] <sup>+</sup> (relative peak area >2%) with sulfate.                        |
|            | BCOC-N                      | BC internally mixed with OC and nitrate                                  | three of the signals in 37[C <sub>3</sub> H] <sup>+</sup> , 43[C <sub>2</sub> H <sub>3</sub> O] <sup>+</sup> , 51[C <sub>4</sub> H <sub>3</sub> ] <sup>+</sup> and 63[C <sub>5</sub> H <sub>3</sub> ] <sup>+</sup> (relative peak area >2%) with nitrate.                        |
|            | BCOC-SN                     | BC internally mixed with OC, sulfate, and nitrate                        | three of the signals in 37[C <sub>3</sub> H] <sup>+</sup> , 43[C <sub>2</sub> H <sub>3</sub> O] <sup>+</sup> , 51[C <sub>4</sub> H <sub>3</sub> ] <sup>+</sup> and 63[C <sub>5</sub> H <sub>3</sub> ] <sup>+</sup> (relative peak area >2%) with comparable nitrate and sulfate. |
| BC-other   | BC-other                    | Remaining BCc particles that do not belong to the BCc types listed above |                                                                                                                                                                                                                                                                                  |

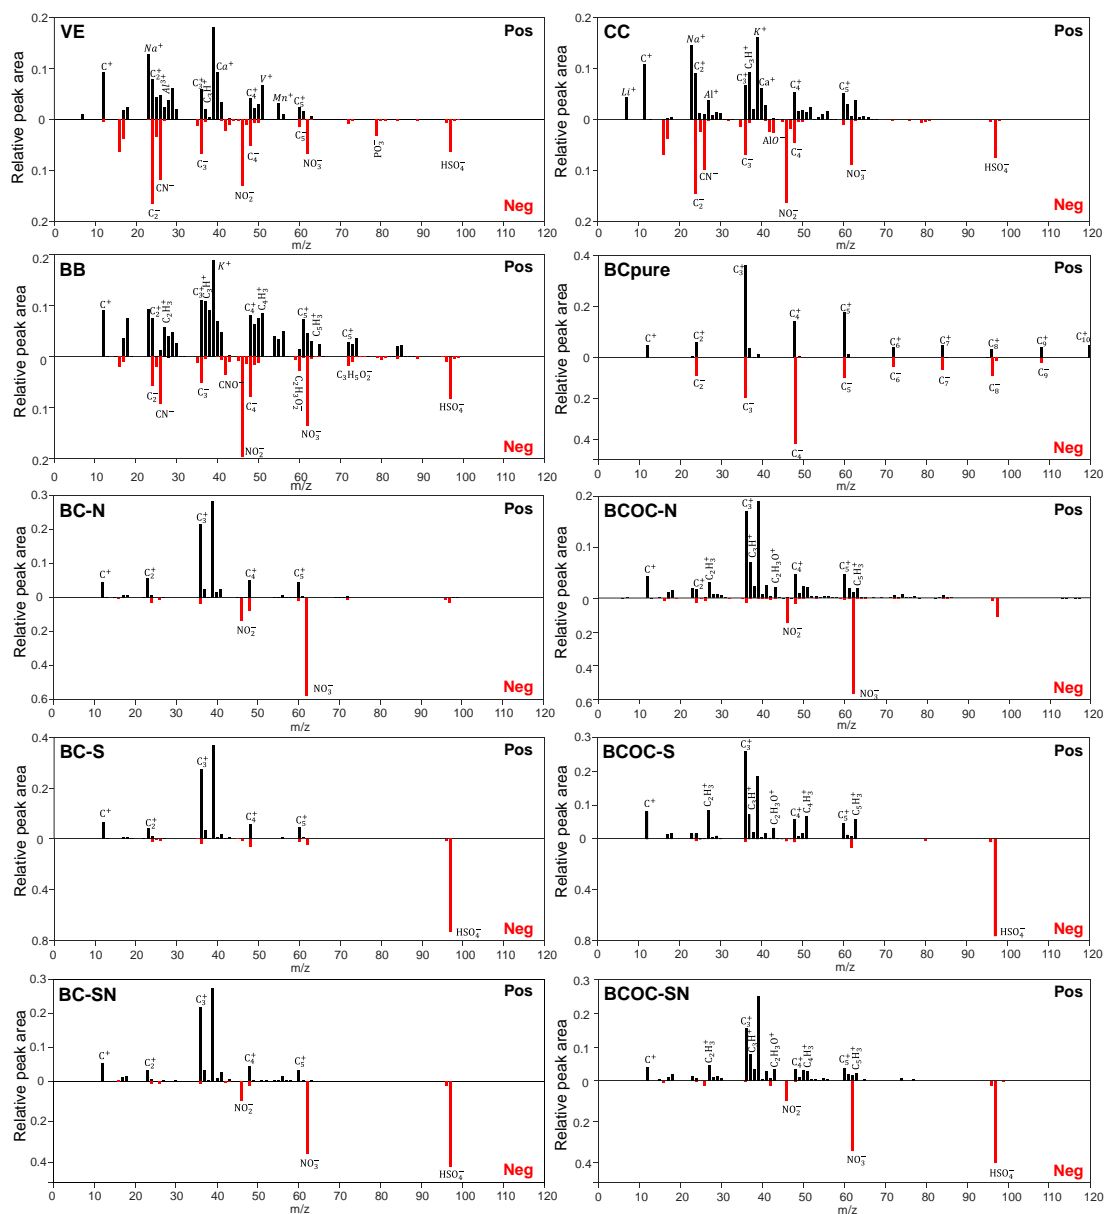

**Figure S1.** Average mass spectra of different types of BCc particles (Mass spectra of particles of Mix and BC-other types are not shown)

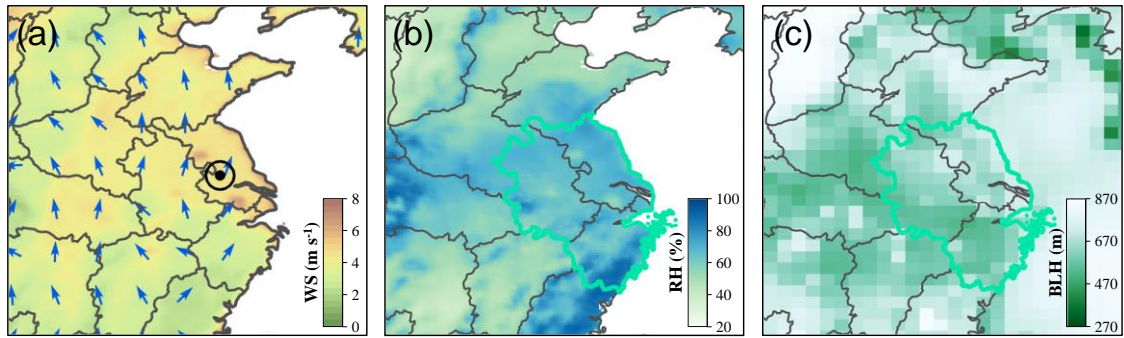

**Figure S2.** Meteorological conditions during the lockdown period (LD) based on the ERA5 reanalysis data. **(a)** Wind direction (WD, vectors) and wind speed (WS, contours) at 20 m. **(b)** Relative humidity (RH). **(c)** Boundary-layer height (BLH). The circle symbols in the maps indicate the location of Yangzhou and the green line regions represent the YRD area.

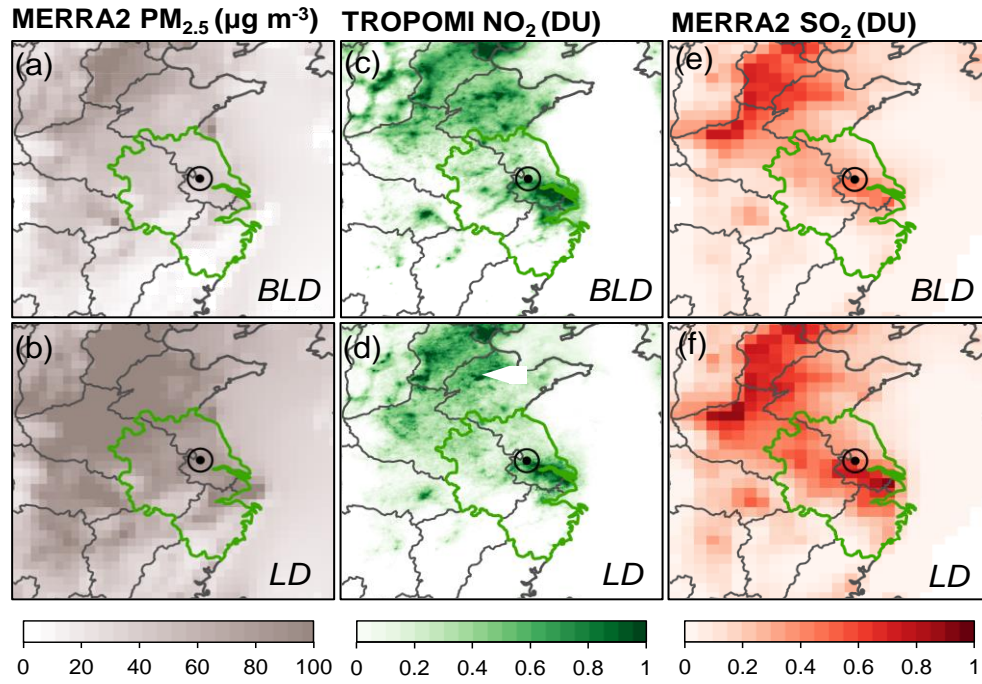

**Figure S3.** Spaceborne measurements of NO<sub>2</sub> from TROPOMI, SO<sub>2</sub> and PM<sub>2.5</sub> from MERRA-2. **(a, b)** Surface mass concentrations of PM<sub>2.5</sub> averaged over the BLD and LD periods. **(c, d)** Column-integrated NO<sub>2</sub> averaged over the BLD and LD periods. **(e, f)** Surface mass concentrations of SO<sub>2</sub> averaged over the BLD and LD periods. The circle symbols in the maps indicate the location of Yangzhou and the green line regions represent the YRD area. 1 DU = 0.4462 mmol m<sup>-2</sup>.

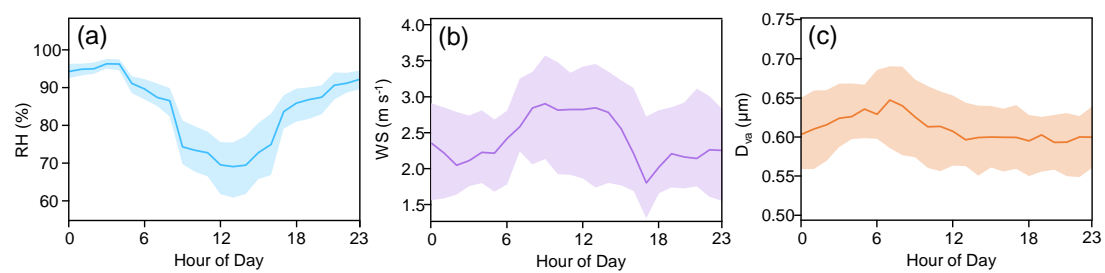

**Figure S4.** The diurnal variation of **(a)** relative humidity (RH), **(b)** wind speed (WS), and **(c)** vacuum aerodynamic diameter ( $D_{va}$ ) during the LD period (shaded area represents one standard deviation)
